# Supplementary material for: Quality of life profile in three cohorts of community-dwelling Swiss older people
Source: Springer Nature journal article supplement (doi:10.1186/s12877-019-1112-4), 2019-04-02

**Supplementary figure 1: selection procedure of participants**

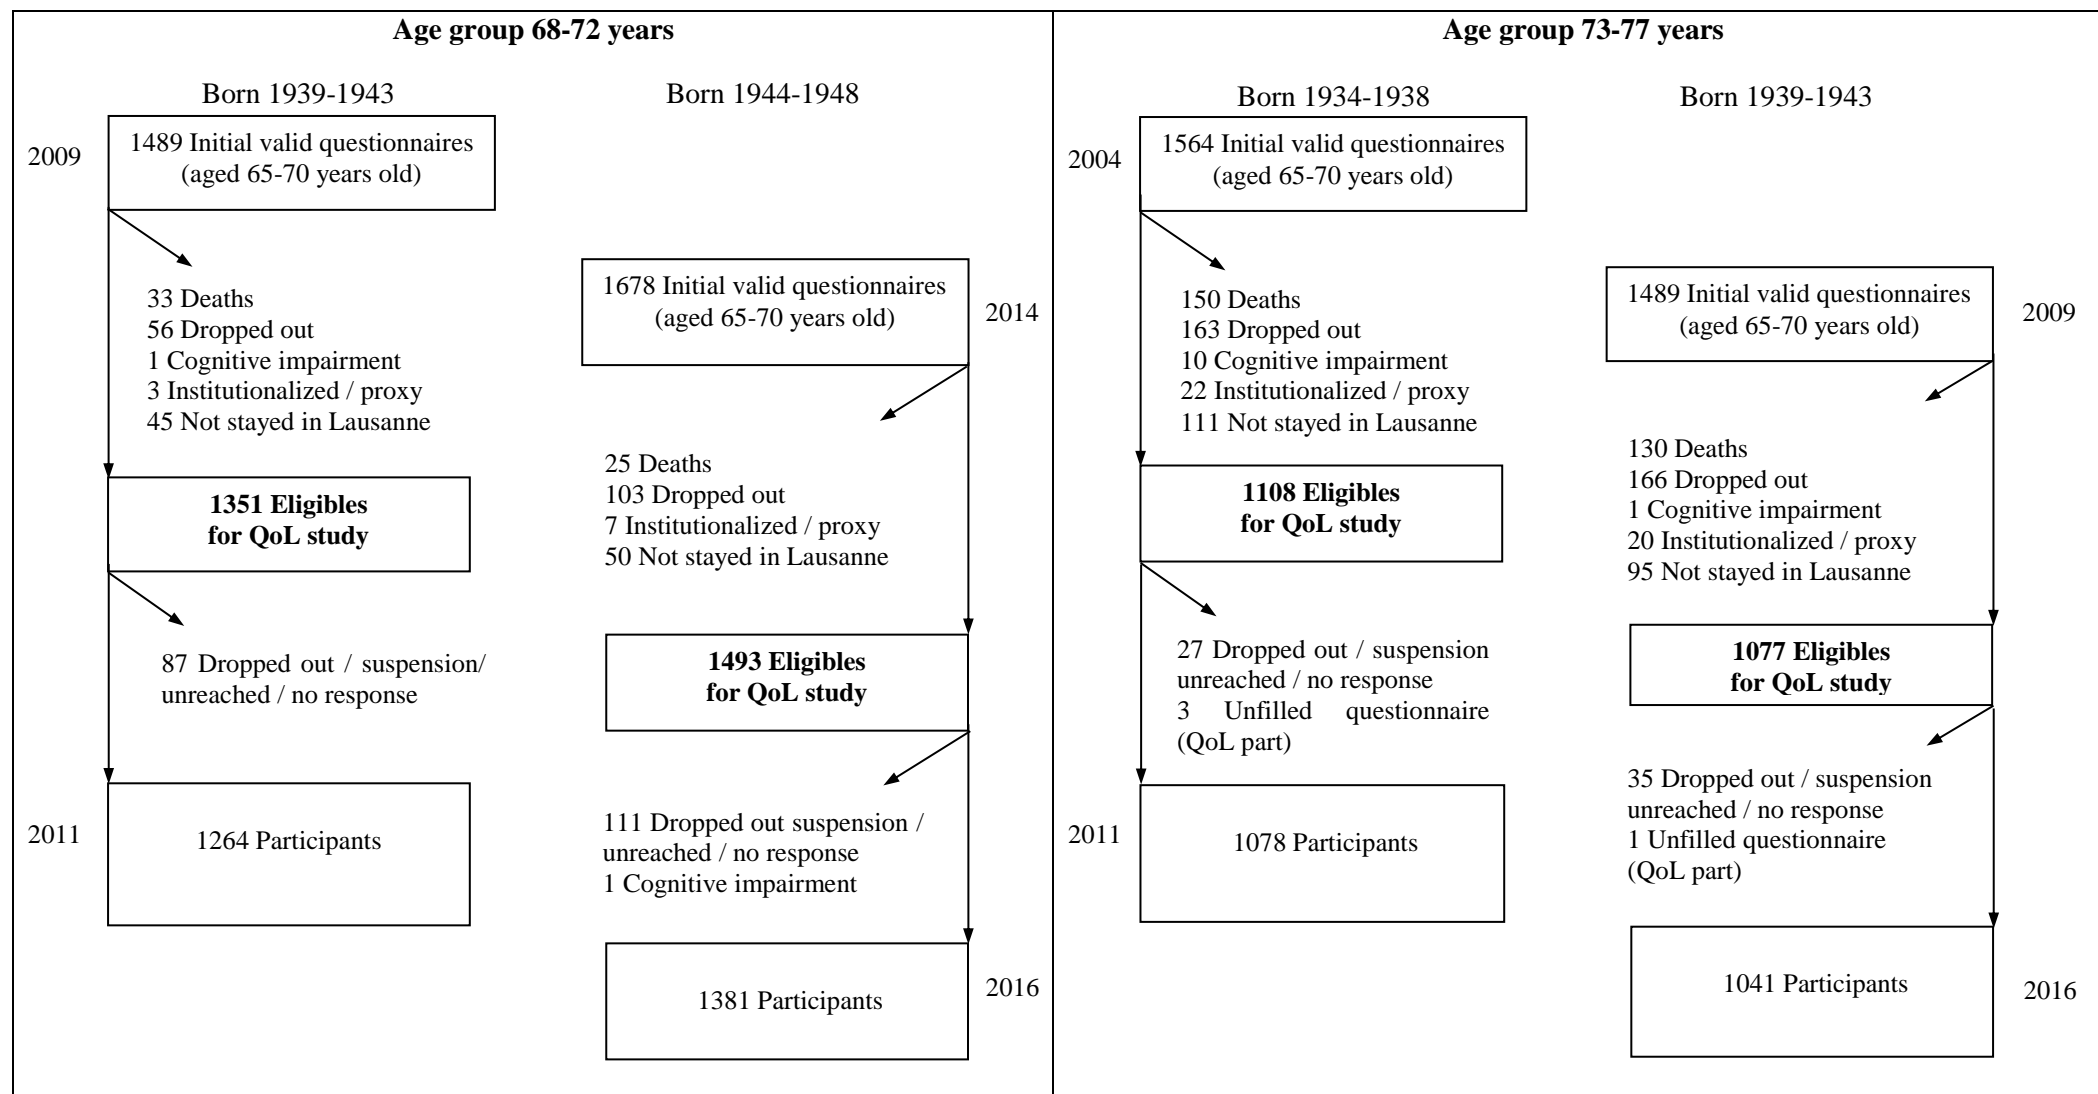

Supplement: MOESM1 [file 16591268]
